# Supplementary material for: Blood Pressure and Safety Events With Vericiguat in the VICTORIA Trial
Source: PubMed Central journal article supplement — J Am Heart Assoc. 2021 Nov 6;10(22):e021094. doi: 10.1161/JAHA.121.021094 (PMC8751950; doi:10.1161/jaha.121.021094), 2021-11-06

# **SUPPLEMENTAL MATERIAL**

## **VICTORIA Executive Committee**

Paul W. Armstrong, Canadian VIGOUR Centre, University of Alberta (Study Chair)

Christopher M. O'Connor, Inova Heart and Vascular Institute, Duke Clinical Research Institute,  
(Study Co-Principal Investigator)

Burkert Pieske, Charité University Medicine and German Heart Center (Study Co-Principal  
Investigator)

Kevin J. Anstrom, Duke Clinical Research Institute

Javed Butler, University of Mississippi Medical Center

Justin A. Ezekowitz, Canadian VIGOUR Centre, University of Alberta

Adrian F. Hernandez, Duke Clinical Research Institute

Carolyn S.P. Lam, National Heart Centre Singapore, Duke-NUS Graduate Medical School

Joerg Koglin, Merck & Co.

Piotr Ponikowski, Wroclaw Medical University

Lothar Roessig, Bayer AG

Adriaan A. Voors, Groningen Heart Failure Research Institute, University of Groningen

## **VICTORIA Planning Committee**

### **Canadian VIGOUR Centre (CVC)**

Kris Reay, Senior Administrative Assistant

Lisa Soulard, Executive Assistant

Tracy Temple, Associate Director, Clinical Trials

Cynthia Westerhout, Associate Director, Biostatistics/Strategic Planning

### **Duke Clinical Research Institute (DCRI)**

Robert J. Mentz, Associate Professor, Associate Program Director, Duke Cardiovascular Disease Fellowship

**VICTORIA Clinical Trial Team**

Mahesh J. Patel, Executive Director, Merck Global Clinical Development Cardiovascular

Constance Hamlin, Vericiguat Program Lead, Merck Global Clinical Trial Operations

Rhonda Lovett, Lead Study Manager, Merck Global Clinical Trial Operations

Nicholas Ryan, Lead Clinical Scientist, Merck Global Clinical Trial Operations

Robert Blaustein, Executive Director, Merck Global Clinical Development Cardiovascular

Gregory Golm, Executive Director, Merck Biostatistics and Research Decision Sciences

Gang Jia, Sr Principal Scientist, Merck Biostatistics and Research Decision Sciences

Christi Kent, Vericiguat Program Lead Medical Writer, Merck Global Clinical Trial Operations

Jaco De Klerk, Director, Merck Global Clinical Trial Operations, Therapeutic Area Lead Cardiovascular

Christina Salerno, Executive Director, Merck Global Clinical Trial Operations

Sabine Broecker-Zweering, Clinical Project Manager, Bayer AG

Richard Nkulikiyinka, Vice President, Head of Cardiology & Nephrology, Bayer AG

Elaine Wu, Biostatistics, Bayer AG

Katharina Mueller, Biostatistics, Bayer AG

**Imaging Committees**

Burkert Pieske, Chair

Carolyn Lam

**Academic Echocardiography Core Laboratory, Charité University Medicine, Berlin**

Elisabeth Pieske-Kraigher, Director ECHO Core Lab Charité

Martin Kropf, Technical Director, Echo Core Lab Charité

### **CMR Imaging Core Laboratories**

#### **Duke Cardiovascular MR Center**

Raymond J. Kim, Professor of Medicine, Co-Director of the Cardiac MRI Center

Michele Parker, Statistician/Business Manager

### **German Heart Center Berlin and University Medicine Berlin**

Sebastian Kelle, Professor, Charité, Head of Cardiac MRI, German Heart Center Berlin

Jeanette Schulz-Menger, Professor, Charité

### **Biomarkers / Pharmacogenomics Committees**

#### **Inova Heart and Vascular Institute**

Christopher deFilippi, Director, Inova Biocore Laboratory Liaison, Vice-Chair of Academic Affairs

Rachel Bell, Director, Inova Heart and Vascular Institute Biocore Laboratory

Christopher O'Connor, President and Executive Director, Inova Heart and Vascular Institute,

Adjunct Professor of Medicine, Duke University

Palak Shah, Director, Cardiovascular Genomics Center

#### **Biomarker/Pharmacogenomics Subcommittee**

Christopher O'Connor, Chair

Members: Peter Shaw, Michael Lassman, Frank Kramer, Palak Shah, Adriaan Voors, Mahesh

J. Patel, Robert Christenson, Christopher de Filippi

### **Health Economics**

Daniel Mark, Director Outcomes Research, Professor of Medicine, Vice Chief for Academic Affairs, Division of Cardiology, Duke University, DCRI

Linda Davidson-Ray, Project Leader, DCRI

### **VICTORIA National Leaders**

**Argentina:** M. Cecilia Bahit; **Australia:** David M. Kaye; **Austria:** Diana Bonderman; **Belgium:** Anne-Catherine Pouleur; **Brazil:** Edimar A. Bocchi; **Canada:** Justin A. Ezekowitz; **Chile:** Fernando Lanas; **China:** Jian Zhang; **Colombia:** Clara Saldarriaga; **Czech Republic:** Vojtěch Melenovský; **Denmark:** Jens Refsgaard; **Finland:** Johan Lassus; **France:** Alain Cohen-Solal; **Germany:** Frank Edelmann; **Greece:** Dimitrios N. Tziakas; **Guatemala:** Juan Luis Arango Benecke; **Hong Kong:** David Siu; **Hungary:** Ebrahim Noori; **Ireland:** Kenneth McDonald; **Israel:** Basil S. Lewis; **Italy:** Michele Emdin, Michele Senni; **Japan:** Hiroyuki Tsutsui; **Malaysia:** Imran Zainal Abidin; **Mexico:** Jorge Escobedo; **Netherlands:** Arend Mosterd; **New Zealand:** Richard W. Troughton; **Norway:** Dan Atar; **Peru:** Armando Lionel Godoy Palomino; **Philippines:** Eugenio B. Reyes; **Poland:** Piotr Ponikowski; **Puerto Rico:** Jose B. Vazquez-Tanus; **Republic of Korea:** Myeong-Chan Cho; **Russian Federation:** Yury Lopatin; **Singapore:** David Sim; **South Africa:** Karen Sliwa-Hähnle; **Spain:** José López-Sendón; **Sweden:** Lars H. Lund; **Switzerland:** Diana Bonderman; **Taiwan:** Chern-En Chiang; **Turkey:** M. Ali Oto; **Ukraine:** Vojtěch Melenovský; **United Kingdom:** Martin Cowie; **United States:** Michael M. Givertz, Ileana L. Piña, Nancy K. Sweitzer

### **VICTORIA Data Safety Monitoring Committee**

John J.V. McMurray, University of Glasgow (Chair); Christopher B. Granger, Duke Clinical Research Institute, Duke University Medical Center; Thomas D. Cook, Department of Biostatistics & Medical Informatics, University of Wisconsin-Madison; Gary S. Francis, Division of Cardiovascular Disease, University of Minnesota; Karl Swedberg, Department of Molecular

and Clinical Medicine, University of Gothenburg. External independent statistical support, Haley Hedlin, Stanford University.

### **VICTORIA Clinical Endpoints Committee**

G. Michael Felker (Co-chair), W. Schuyler Jones (Co-chair), Karen P. Alexander, Sana M. Al-Khatib, Keith E. Dombrowski, Robert W. Harrison, Renato D. Lopes, Robin Mathews, Thomas J. Povsic, Matthew T. Roe, Sreekanth Vemulapalli, Duke Clinical Research Institute, Duke University.

### **VICTORIA Primary Site Investigators / Primary Study Coordinators**

**Argentina:** Eduardo Roque Perna / Maria Galarza Salazan; Ignacio MacKinnon / Florencia Eden; Luis Cartasegna / Viviana Novas; Hugo A. Luquez / Ana Cenci; Miguel Angel Hominal / Maria Veronica Bianchini; Rodolfo Andres Ahuad Guerrero / Andrea Alvarez D Amelio; Carlos Alberto Poy / Maria Poy; Claudio R. Majul / Cecilia Currao; Ezequiel Hector Vottero / Mariana Perrin; Cesar Javier Zaidman / Maria Vanesa Espinosa; Gerardo Zapata / Luciana Arias; Sonia Angelica Sassone / Lucas Tonelli; Daniel Agustin Chirino Navarta / Maria Mangini; Jesus Cuadrado / Paula Bordoni. **Australia:** David Kaye / Kaye Carter; John Amerena / Toni Shanahan; Scott McKenzie / Kathryn Stibijl; Carmine De Pasquale / Fiona Wollaston; David Martin Colquhoun / Antonio Ferreira-Jardim; Alicia Chan / Greer Dymmott; Brendan McQuillan / Katayun Mohammadi; David Cross / Judy Jeffrey; Andrew Sindone / Magdalena Gebran; Amit Shah / Gill Tulloch; Maged William / Bets Conway; James Wong / Donna North. **Austria:** Dirk von Lewinski / Karin Brandner; Uta Hoppe / Kristen Kopp; Regina Steringer Mascherbauer / Claudia Steinkellner; Diana Bonderman / Christina Binder; Christopher Adlbrecht / Maria Leitgeb. **Belgium:** Anne-Catherine Pouleur / Florence Sinnaeve; Matthias Dupont / Carola Claes; Michel De Ceuninck / Els Vancayseele; Philippe Timmermans / Gregory Van Genechten; Pierre Troisfontaines / Mireille Massoz. **Canada:** Thao Thanh Huynh / Caroline Boudreault; Eric

Sabbah / Isabelle Chausse; Ronald Leonard Bourgeois / Karen Boyd; Michael Heffernan / Marie Birch; Marie-Claude Parent / Helene Brown; A. Shekhar Pandey / Tatiana Ballivian; Nadia Giannetti / Reza Sahebamei; Saul Vazel / Beverley Fox; Dennis Wayne Rupka / Sandi Thiessen; Christian Constance / Marie-France Gauthier; Justin Ezekowitz / Quentin Kushnerik; Allan Schaffer / Wendy Janz; Michael Chan / Jennifer Knight; Serge Lepage / Daniel Soucy; John D. Parker / Elaine Hsu; Lisa Mielniczuk / Ermina Moga; Benoit Coutu / Julie Fleury; Paul MacDonald / Kathleen Hines; Diego Delgado / Natalia Nugaeva; Ying Sia / Isabelle Roy; David Laflamme / Christel Simard; Gilbert Gosselin / Katia Drouin; Brian Clarke / Kimberley Ronak; Denis Saulnier / Melissa Cote; Bruce Alexander Sussex / Bernadette Druken; Miroslaw Rajda / Jayne Falkenham; Ashok Mukherjee / Beverly Bozek; Gordon Willy Pak Ling Moe / Carlos Fernando; Sebastien Bergeron / Hugo Tremblay; Marcelo Coelho Shibata / Bonnie Woloschuk; Dante Manyari / Tracy Cleveland; Frank Nigro / Crystal Forsyth; Annie Roy / Helene Bolduc; Danielle Dion / Nancy Gilbert; James Y Cha / Judy Otis; Melinda Barabas / Marie-Josée Chartrand. **Chile:** Victor Assef / Andrea Eikhof; Manuel Novajas Balboa / Carla Belen Aravena Vasquez; Juan Carlos Prieto Dominguez / Viviana Noriega; Patricio Yovaniniz / Marcela Grandon; Fernando Lanas / Jessica Hidalgo. **China:** Yuhui Zhang / Jing Dong; Haiying Dai / Ying Xiao; Tingbo Jiang / Lin Shi; Jiyan Chen / Peiyu He; Daoquan Peng / Fangmei Qing; Biao Xu / Ruihong Wang; Xiang Gu / Min Wang; Zhuhua Yao / Ying Chen; Peizhi Miao / Zhenfei Chen; Hui Li / Dongyan Huang; Qing Yang / Xuefang Yu; Aidong Shen / Xin Zhang; Xiaohui Liu / Qiang Lv; Yugang Dong / Dan Liu; Jingfeng Wang / Huijun Ouyang; Chengchun Tang / Yong Chen; Hui Gong / Dandan Teng; Jing Yan / Linying Xu; Weihong Jiang / Xiaowei Zhou; Guosheng Fu / Ying Zheng; Shuyang Zhang / Lihong Xu; Zhenyu Yang / Chenying Wu; Xiumin Han / Yuxia Wang; Jing Yu / Qiongying Wang; Lihong Wang / Lili Zheng; Wei Jin / Nan Zhang; Chuanhuan Zhang / Xiaojian Sun; Yali Yao / Peng Lei; Zhaofen Zheng; Junkui Wang / Fengling Ma; Mingzhi Long / Sulan Wang; Hong Zhang / Mingmei Guo; Manhua Chen / Yayun Wang; Zhanquan Li / Ruili Duan; Zuyi Yuan / Tiaotiao Li; Yibin Mei / Linyan Ye; Zhouqing Huang /

Xingyuan Zhang; Wenling Liu / Lei Li; Ruiping Zhao / Jie Gong; Dongqing Zhang / Jiahui Zhu;  
Chengjian Yang / Chunxia Wang; Zheng Ji / Gao Xinpei; Xia Mei / Mingyun Liu; Xin Zhang.

**Colombia:** Clara Saldarriaga / Paula Garcia Amaya; Wilder Castano Osorio / Maria Dussan;  
Franklin Roberto Quiroz Diaz / Yuleth Prada; Carlos Francisco Jaramillo Munoz / Ana Zapata;  
Monica Jaramillo / Solmara Bello; Rodrigo Botero / Sandra Salazar; Monica Lopez Pareja /  
Claudia Mora; Nicolas Ignacio Jaramillo Gomez / Ana Zapata; Juan Camilo Garcia / Fabian  
Torres; Miguel Alfredo Moncada / Laura Velez Gil; Jaime Andres Torres / Yolanda Lievano.

**Czech Republic:** Vojtech Melenovsky / Miroslava Krausova; Jan Malik; Martin Hajsl / Katerina  
Mala; Jan F Vojacek / Jana Fridrichova; Filip Malek / Dana Rihova; Vladimir Cech / Lenka

Masarikova; Vilma Machova; Jindrich Spinar; Jan Macha; Libor Nechvatal. **Denmark:** Kenneth  
Egstrup / Lene Moltrup; Benedikte Haastrup / Camilla Jespersen; Ole Nyvad / Lene Tanggaard;

Lars Fog / Pauline Johansen; Henrik Wiggers / Kristine Serup-Hansen; Jens Due Lomholdt /  
Kari Niemann; Olav Wendelboe Nielsen / Elisa Stockholm; Mustafa Taskiran / Lotte Ring

Pedersen. **Finland:** Kai Nyman / Tiina Sankari; Heikki Ukkonen / Tuija Vasankari; Johan Lassus  
/ Sari Karesvuori. **France:** Alain Cohen-Solal / Miguel Vazquez Ibarra; Karim Gallouj / Angelique

Lombart; Thibaud Damy / Mounira Karhoubi; Michel Galinier / Nathalie Rosoli; Guillaume Taldir  
/ Maelle Vomscheid; Jean-Michel Tartiere / Charline Genin; Muriel Salvat / Delphine Pollet;

Bernard Citron / Ouarda Lamallem; Nicolas Girerd / Lydie Poinson; Francois Jourda /  
Emmanuelle Mougnot; Hatem Boughanmi / Hanane Fodil; Lionel Benhamou / Ghania Harzi.

**Germany:** Stefan Störk / Anja Knoppe; Karl-Friedrich Appel / Petra Becker; Johann Bauersachs  
/ Manuela Geyer; Ekkehard Schmidt / Kristina Schmidt; Frank Edelmann / Sophia Stempel;

Daniel Beug / Michael Bruder; Michael Jeserich / Mariana Rupprecht; Hendrik Haake / Bianca  
Krug-Hoeren; Andreas Hagenow / Anja Kuntzsch; Mirjana Vojvodic-Mayer / Ronny Lux; Thomas

Horacek / Manuela Pluemer-Schmidt; Markus Knapp / Edith Suepple-Poch; Veselin Mitrovic /  
Annerose Peil; Stephan Rosenkranz / Susanne Roelle-Hoehne; Raffi Bekeredjian / Ina Probst;

Izabela Tuleta / Marjo Lauterborn; Bernhard Winkelmann / Linda Tenbusch; Wolfgang Zeh /



Sandra Eble; Mirjam Kessler / Uta Dichristin; Lars Maier / Esther Kellner. **Greece:** Dimitrios Tziakas / Georgios Chalikias; Filippos Triposkiadis / Michalis Papamichalis; John Parissis / Vasiliki Bistola; Haralampos Karvounis / Georgios Giannakoulas; Dimitrios Tousoulis / Christina Chrysohoou; Katerina Naka / Anna Kotsia. **Guatemala:** Pablo Carlos Montenegro Valdovinos / Mayra Aguilar; Ronaldo A. Gonzalez Orellana / Ester Meléndez; Juan Luis Arango Benecke / Lissette Garcia de Krumbach; Edgar Rolando Rodríguez / Karla Barrera; Mynor Adolfo Aguilar Vásquez / Karla Barrera. **Hong Kong:** Chung Wah David Siu / Venus San Lui Ho; Pui-Wai Alex Lee / Xue Ting Wang; Katherine Fan / Eva Tam. **Hungary:** Ebrahim Noori / Gyongyver Ibolya Mihaly; Akos Kalina / Anita Szabo; Sandor Kancz / Istvanne Hentzel; Ferenc Lakatos / Krisztina Toth; Bela Merkely / Laura Dzsida; Attila Palinkas / Szilvia Rostasne Toth; Marianna Svab / Balazs Bugarin-Horvath; Robert J. Kirschner / Rozsa Toth Karolyne. **Ireland:** Kenneth McDonald / Joanne Maher; Ross Murphy / Mary Hall; Niall Mahon / Elaine Gilroy; Brendan McAdam / David Farrell; James O Neill / Ciara Blaine. **Israel:** Shaul Atar / Rita Nadaf; Tony Hayek / Mira Hassan; Basil S. Lewis / Lena Zarachovsky; Michael Shochat / Ilana Aloni; Abid Assali / Elena Tsurulnikov; Wadi Kinany / Janna Etkin; Tuvia Ben Gal / Hadas Even Nir; Yaron Arbel / Adi Katalan Shani; Elias Mazen / Gilat Ron Avraham; Sorel Goland / Anastasia Suzdalnizki; Majdi Halabi / Ilana Portnov; Tal Hasin / Astrid Rojansky; Rafat Jabara / Galina Levin; Amos Katz / Orna Tubul; Gil Moravsky / Ira Lapidus. **Italy:** Michele Senni / Marilisa Ambrosio; Claudio Passino / Alessandra Gabutti; Laura Scelsi / Eleonora Vullo; Paolo Midi / Anna Felici; Alessandro Fucili / Maria Sarcone; Savina Nodari / Laura Lupi; Vitaliano Spagnuolo; Maurizio Volterrani / Valentina Morsella; Simona Sarzi Braga / Raffaella Vaninetti; Piergiuseppe Agostoni / Elisabetta Salvioni; Stefano Taddei / Rosa Maria Bruno; Gianfranco Parati / Carlotta Munforti; Rosanna Lauciello / Stefano Coiro; Andrea Mortara / Simone Mazzetti; Gianfranco Sinagra / Federica Ramani; Alessandra Gualco / Simona Cattaneo; Giuseppe Argiolas / Wanda Masala; Franco Cosmi / Beatrice Mariottoni. **Japan:** Akihiro Nakamura / Kazumi Futono; Tatsuya Komaru / Tomoko Endo; Shigeru Fukuzawa / Yumi

Nakamura; Yasuo Okumura / Haruka Sato; Hirotsugu Tabata / Mizuki Saino; Takanori Ikeda / Reiko Kaminishi; Mio Ebato / Akiko Fukatsu; Takahiko Aoyama / Chihiro Kitani; Hiroki Sakamoto / Kaori Amano; Tomoaki Saeki / Kayo Shimano; Kenji Kada / Yoko Tsuzuki; Tetsuo Hashimoto / Madoka Okamoto; Kenshi Fujii / Mari Tsujimoto; Tahei Ichinohe / Saori Okabe; Keiji Hirooka / Yuna Senshu; Tetsuro Ohta / Tomomi Hayashi; Yusuke Kawai / Juri Horio; Atsushi Takaishi / Mikiko Nakamura; Hiroyuki Takatsu / Tomoko Shiota; Koji Maemura / Momoyo Nishida; Yoshisato Shibata / Kaori Nagashima; Taro Shibasaki / Nobue Takahashi; Taro Shibasaki / Nobue Takahashi; Harukazu Iseki / Kenichi Otsuki; Shunzo Matsuoka / Kentaro Motoda; Yoshiharu Higuchi / Hiromi Hayasaki; Mamoru Manita / Riyo Ito; Masahiro Suzuki / Kaori Fumikura; Hiroshi Iwata / Kaori Kinjo; Eiki Takimoto / Yuki Omori; Kazuhiko Yumoto / Jun Yoshizawa; Chisato Izumi / Kanae Hirase; Shinichi Higashiue / Ayaka Ishibaba; Yorihiro Higashino / Takuro Matsumura; Hiroshi Iida / Kaya Kowa; Tokushi Koga / Tomomi Hatakeda; Nobuhiko Atsuchi / Kana Migita; Yukihiko Momiyama / Yusuke Fukuda; Masataka Fukue / Kouji Uchida; Katsumi Saito / Sakiko Iida; Seiji Fukamizu / Junko Harada; Yasuyoshi Takei / Saori Takano; Yoshiki Hata / Arisa Sato; Yumi Shimura / Shinko Hirata; Atsuo Namiki / Noriko Ishida; Ichiro Michishita / Tomomi Ishimoto; Kazuo Usuda / Akiko Oomura; Koichiro Kinugawa / Rumi Sasaki; Takao Matsubara / Hiromi Kidani; Yoshifumi Awaji / Yoko Kaneno; Kentaro Yamashita / Masami Suzuki; Hiroshi Fujita / Aya Mashida; Takahisa Yamada / Shintaro Hirai; Minoru Ichikawa / Takae Muromaki; Tomohito Ohtani / Sachiyo Yamaguchi; Yutaka Furukawa / Mika Takata; Masato Baden / Futoshi Kawasaki; Hideki Tashiro / Yuko Kita; Mizuri Taki / Kuniko Suzuki; Kenji Nakama / Chiaki Oota; Kiyoshi Hibi / Mizuho Shiono; Satoaki Matoba / Natsuki Kimura; Akihiko Takahashi / Megumi Fujino; Tomomi Ide / Chiharu Tanaka; Osamu Ueda / Rieko Shimojima; Takehiko Kuramochi / Michiko Ando; Haruhiko Onaka / Anri Maeda; Tetsuya Higami / Ikumi Nishibe; Mitsunori Abe / Megumi Matsugi; Junya Ako / Kimiko Yamamura; Tomoya Ueda / Yuki Itokazu; Kotaro Sumii / Kano Ichii; Masatoshi Shimizu / Megumi Irikura; Shigeo Shimizu / Misa Ayabe; Taku Matsubara / Satoko Kaneko; Tomomi

Koizumi / Keiko Watanabe; Satoru Sakagami / Mariko Kumaki; Atsushi Suzuki / Tomoe Kawano; Yusuke Katayama / Hiroko Nakamura; Isao Taguchi / Yuko Araki; Nobuyoshi Higa / Yasuka Oshiro; Kumiko Yahikozawa / Shiori Anzai; Tatsuya Nunohiro / Daichi Nishi; Shuichi Osaki / Yoshiaki Tanaka; Masayuki Kaneko / Kimiko Noguchi; Noriaki Watanabe / Toru Oishi; Koichi Fuse / Yukari Baba. **South Korea:** Myeong-Chan Cho / Ga-Eun Kim; Jin-Ok Jeong / Young-eun Choi; Hae-Young Lee / Eunjin Hur; Seok-Min Kang / WonMi Lee; Kye Hun Kim / Jiyeon Song; Byung-Su Yoo / Seonmi Shin; Mi Seung Shin / Hei Won Oh; Eung Ju Kim / JinJu Park; Dong-Ju Choi / Eun ji Yoon; Dong Heon Yang / JiHyeong Choi; Jung-Hyun Choi / Hwayoung Jeong; Jin-Oh Choi / Seo Jin Hyun; Sang-Ho Jo / Lee Sujin; Dong Kyu Jin / Jiwon Jeon; Joon-Han Shin / Ji Sung Na; Dong-Soo Kim / Eunryul Oh. **Malaysia:** Tiong Kiam Ong / Juriah Sulehan; Hamat Hamdi Che Hassan / Zati Amni Ismahadi; Hafisyatul Aiza Zainal Abidin / Nurhasanah Abdul Rahman; Imran Zainal Abidin / Manhaiyun Suhaimi; Hounng Bang Liew / Mabelle Wong; W Yus Haniff W Isa / Zalida Mamat; Siti Khairani Zainal Abidin / Kanaga Lakshimi Ravinttiran. **Mexico:** Manuel Odin de los Rios Ibarra; Carlos Rodolfo Martinez Sanchez / Diestefano Ronquillo Ramirez; Abel Salazar Gaytan / Carmen Gonzalez Sandoval; Marco Antonio Alcocer Gamba / Wendy Munoz Rosales; Ramon Miguel Esturau Santalo / Yazmin Sanchez Mendoza; Gustavo Francisco Mendez Machado / Haydea Hirata Avila; Raul Reyes Araiza / Jaime Ruiz Morales; Jorge Escobedo de la Pena / Beatriz Villegas Lara; Enrique Lopez Rosas / Michelle Meza Hernandez; Jaime Chavez Michel / Elena Ruiz Rubio; Alberto Varela. **Netherlands:** Arend Mosterd / Coriet Hobé-Rap; Dirk Lok / Rina Dommerholt; Henk Swart / Catharina Terwisscha van Scheltinga; Ruud van de Wal / Ilvy van Lieshout; Peter Van der Meer / Anja Branderhorst; Henri Albert Werner / Ivonne van Ruijven-Mastenbroek; Matthijs F.L. Meijs / Linnea Oldenhof; Frank Den Hartog / Margreeth Singerling. **New Zealand:** Richard William Troughton / Stephanie Rose; Fraser Hamilton / Sharon Jacques; Katherine Ferrier / Jo-Anne Kovacs; Mayanna Lund / Lynette Pearce; Robert Doughty / Mariska Terbals; Nezar Amir / Cathy Hulbert; James Pemberton / Deborah Scott. **Norway:** Dennis Nilsen / Jorunn Nilsen; Lars

Gullestad / Elisabeth Bjorklund; Dan Atar / Hege Claussen; Havard Keilegavlen / Nina Faalun; Vidar Ruddox / Annboerg Pedersen. **Peru:** Aldo Edwin German Rodriguez Escudero / Sonia Romero; Boris Orihuela / Monica Del Portal; Victor Elias Rodriguez / Nurys Cabanillas Gallo; Felix Alvaro Medina / Jeanneth Rodriguez; Libia Lu Galarreta / Jill Espejo; Armando Lionel Godoy Palomino / Milagros Matta. **Philippines:** David Raymund K. Salvador / Wendy Lynn Cudiamat; Eugene Reyes / Susan De Guzman; Rody Sy / Claudette Silva; Amelita Brillantes / Amy Alon-Alon; Gabriel Jocson III / Frances Joyce Cortez; Louie S. Tirador / Charity Daine A. Gamboa; Ramoncito S. Habaluyas / Mary Jane Incognito. **Poland:** Joanna Szachniewicz / Sylwia Nawrocka-Millward; Aleksander Goch / Tomasz Lugowski; Jadwiga Nessler / Urszula Czubek; Ewa Straburzynska Migaj / Agnieszka Przepiora; Zbigniew Pijanowski / Monika Pijanowska; Jaroslaw Kasprzak; Ewa Mirek-Bryniarska / Wojciech Zareba; Wlodzimierz Musial / Agnieszka Tycinska; Pawel Miekus / Justyna Przydatek; Waldemar Krysiak / Edyta Skorek; Przemyslaw Leszek / Paula Polaska; Grzegorz Krzysztof Skonieczny / Monika Roliard; Marek Wujkowski / Mariusz Strupiechowski. **Puerto Rico:** Jose B. Vazquez-Tanus / Maria Diago; Julio Baez / Lusdian Casanova-Jimenez; Carlos R. Zayas-Torres / Aleja Duran; Pedro J. Colon-Hernandez / Merari Carrasquillo; Maria L. Rios Bonilla / Magaly Marcano; Pedro Garcia-Gordo / Jessenia Navedo-Santos. **Russia:** Svetlana Boldueva / Natalia Shvets; Natalia Orlova / Maria Klepikova; Alexander Kastanayan / Leily Babaeva; Imad Meray / Marina Teterina; Yury Shvarts / Larisa Konshina; Sergey Yakushin / Evgeniy Filippov; Sergey Sayganov / Dmitry Nikolaev; Alexander Vishnevskiy / Vladislav Zykov; Oleg Solovev / Dmitry Nazarov; Olga Bolshakova / Ekaterina Polunicheva; Tatiana Treshkur / Edvard Berngardt; Vladimir Nosov / Lubov Koroleva; Gadel Kamalov / Liliya Urazaeva; Yury Lopatin / Oleg Ilyukhin; Evgeny Morozov. **Singapore:** Kheng Leng David Sim / Yuen Yet Lee; Shao Guang Sheldon Lee / Xuan Tang; Dinna Kar Nee Soon / Boon Khim Lim; Raymond CC Wong / Cher Yi Wong; Seet Yoong Loh / Geok Cheng Geraldine Tan. **South Africa:** Mark Jonathan Abelson / Annusca King; Junaid Bayat / Katija Badat; Naresh Ranjith / Shavina Ramdas; Theema Nunkoo; Hans Walter Prozesky / Christina

Naude; Muhammed Ameen Fulat / Michelle Pretorius; Mpiko Ntsekhe / Noloyiso Mtana; Eric Q Klug / Vaman Naidoo; Larisha Pillay-Ramaya / Sharon Phillips; Ellen Makoali Makotoko / Andonia Page; Moelo Malahleha / Mosidi Pitsoane. **Spain:** Jose Lopez-Sendon / Guiomar Mediavilla Garcia; Jose Ramon Gonzalez Juanatey / Jose Seijas Amigo; Manuel Martínez-Sellés / Olga Sobrino González; Eduardo González-Ferrer / Paz González; Nicolas Manito Lorite / Sonia Guerrero; Núria Farré López / Cristina Soler Ayat; Juan Jose Gomez Doblás / María Robles; Julio Núñez / Anna Mollar Fernández; Manuel Gómez Bueno / Ariadna González Segovia. **Sweden:** Lars Lund / Ann Hultman-Cadring; Tymon Pol / Annika Langoe; Ole Hansen / Else Nake; Tamas Danyi / Anna-Karin Kruse; Christer Magnusson / Ninve Palo; Michael Fu / Kim Fahlen; Entela Bollano / Ann-Christin Westlund. **Switzerland:** Roger Hullin / Sandrine Salzmann; Tiziano Moccetti / Anna Serra; Christian Mueller / Dayana Flores. **Taiwan:** Chern-En Chiang / I-Chen Lin; Juey-Jen Hwang / Yi-Chun Chen; Wei-Ting Chang / Shu-Fen Su; Ting-Hsing Chao / Wen-Hui Tseng; Yen-Wen Wu / Yung-Cheng Chen; Ming-En Liu / Vinny Chou. **Turkey:** Yuksel Cavusoglu; Mehmet Birhan Yilmaz; Vedat Sansoy; Tayfun Sahin; Murat Sezer; Ahmet Celik; Mehmet Ali Oto; Istemihan Tengiz. **Ukraine:** Oksana Reshotko; Oleksandra Donets / Yuliia Rybachok; Oleg Sychov / Olena Romanova; Oleksandr Kulbachuk / Yuliia Klitsunova; Natalia Velichko / Nataliia Tomakh. **United Kingdom:** Iain Squire / Judith Fisher; Hugh Bethell / Emma Howard; Craig Scott Barr / Julie Dean; Andrew Clark / Jeanne Bulemfu; Justin Cooke / Amanda Whileman; Ceri Davies / Jane Pheby; Theresa McDonagh / Jonathan Breeze; Kenneth Wong / Catherine Fleming. **United States:** Jay Amin / Theresa Cervoni; Shamaila Aslam / Dawn Burns; Alan J. Bank / Nicole Gernes; Noel W. Bedwell / Mary Craig; Bruce J. Iteld / Brandy Ocman; Rajinder Bhalla / Teresa Hicks; A. Alan S.P. Chu / Susan Nguyen; James Feldman / Madeline Peek; Ferris George / Christine Baker; Wayne L. Gray / Sherry Adair; Preetham Jetty / Alyssa Key; Navid Kazemi / Suzette Hollis; Joshua Larned / Mara-Li Ortiz; Janet L Smith / Tina Abell; Linda Cadaret / Cynthia Larew; Robert Long / Theresa Hickey; Sharan S. Mahal / Sivaradhika Yandamuri; David J. Whellan / Daniel Schwegler; Peter

McCullough / Rebecca Baker; John McGinty / Nancy Fry; Jamie M. Pelzel / Ashley Douvier;  
Juan Vilaro / Sarah Long; Richard Perlman / Donna Hoopes; Ramana Podugu / Kathleen Smith;  
Peter Rahko / Karen J. Olsen; Ashwin Ravichandran / Bonnita Reilly; Renee Sangrigoli / Linda  
Schwarz; Trevor O Greene / Cathy Jackson; Palak Shah / Teleah Davis; Dennis Spiller /  
Smelda Ferrin; Dilip B. Viswanath / Sue Manga; Zi Jian Xu / Deborah Holmes-Rees; Jon M.  
Bittrick / Ericka Calhoun; Gregory Alan Ewald / Karen Bult; Maryjane Farr / Andrea Kim; Les  
Forgosh / Joyce Riestenberg-Smith; Naseem Jaffrani / Rebecca Childers; Douglas Marshall  
Brinkley / Amanda Carroll; Dalton S. McLean / Hugh Pruitt; Greg Lewis / Diane Cocca-Spofford;  
Harvey A. Snyder / Louise Pantuck; Edward J. Teufel / Brenda Glasgow; Daniel J. Donovan /  
Maria Magdalena Alvarado-Garcia; Ira Dauber / Susan Derbyshire; Suhail Zavarro / Aolani  
Miller; Kevin Sharkey / Alanza Ferguson; Kirkwood Adams / Jana Glotzer; Jose A Perez / Jodie  
Addington; Zulfiquar Bhatti / Carla Burton; Mike B. Melucci / Susan Meier; Michael Huber /  
Fujiko Anazawa; Jenica Upshaw / Katelyn Carr; Mark Jeffrey Holmberg / Lois S. Rasmussen;  
Vanessa J Lucarella / Kathleen Maloney; Kenneth C. Sabatino / Kathleen Maloney; John  
Everett / Emily Kelley; Sandhya Murthy / Angeline Camillo; Nancy Sweitzer / Cindy Schrag;  
Peter E. Carson / Jacqueline Gannuscio; Neil Pendril Lewis / Krista Chafin; Alan Bruce Miller /  
Erin Richardson; Usman Qayyum / Paige Brown; Dinesh Singal / Danielle Giunta; Arun  
Krishnamoorthy / Reema Vallabh; Andrew J Keller / Stephanie Burton; Alexander Adler / Dean  
Thompson; Josef Stehlik / Jennifer Hong; Gary J. Luckasen / Scott Kaczowski; Wayne Old /  
Melinda Bullivant; John Boehmer / Kevin Gardner; Dinesh K. Gupta / Tammy Davey; Hirsch  
Mehta / Gina Ciezkowski; Michael Hong / Elizabeth Hejna; Ashrith Guha / Marcos De Oliveira;  
Tariq Haddad / Deanna Overbeck; Hamid Taheri / Abbey Elie; Ioana Dumitru / Ricardo Guedes;  
Alain Heroux / Carol Kartje; Marcel E. Zughaib / Candice Edillo; Chad Link / Jennifer Boak;  
Andrew Darlington / Kathryn Kaszonyi; Stephen B. Sloan / Deborah Wood; Mayar Jundi / Ann  
Ostrander; Sandeep Khosla / Sudha Lukka; Marcus L. Williams / Kimberly Michel; Andre Artis /  
Kimberly Armstrong; Nicholas Kondo / Gretchen Kostedt; Israel Galtes / Yasnhai Diaz; Luis

Martinez / Beatriz Penafiel; Jose F. Cardona / Abril Juarez; Shuaib Abdullah / Amy Atwell; Albert J. Sharf / Leonardo Cortes; Ravi Bhagwat / Donna Winterrowd; Elie Michael Donath / Maria Ycaza; Alonzo Jones / Carla Burton; Eve Gillespie / Pat Keane-Richmond; Richard Becker / Rachel Mardis; Peter S. Fail / Vicky Parfait; Siby Ayalloore / Tessie Rideaux; Wade May / Julie Zannini; Atul R. Chugh / Stephanie Alford; Mohsin Alhaddad / Lani Holman; Russell J. Strader / Alicia Gneiting; Terry Wells / Jessica Smith; Vernon Young / Cynthia Buchanan; Ish K Singla / Justin Roth; Henry Ooi / Laura Diedrich; Harry T. Colfer / Denise Antonishen; Michael Bauer / Melissa Galindo; Leslie W. Miller / Delia Johnson; Saul Schaefer / Kevin Chun; Denise Barnard / Matt Kawahara; Brian A. Foley / Sabrina Forbus; Andrey Espinoza / Robin Enea; Enrique Flores / Lorie Benedict; Maria Rosa Costanzo / Josilyn Klimek; Dawn Lombardo / Wei Zhou; Charles Treasure II / Doreen Nicely; David Kraus / Paula Higdon; Van Q Nguyen / Shari Cook.

**Table S1. Discontinuation Rate by Randomized Treatment and Safety Event Occurrence.**

|                                           | <b>Vericiguat</b> | <b>Placebo</b>   | <b>Overall</b>       |
|-------------------------------------------|-------------------|------------------|----------------------|
|                                           | <b>(N=2519)</b>   | <b>(N=2515)</b>  | <b>(N=5034)</b>      |
| <b>Syncope or Symptomatic Hypotension</b> |                   |                  |                      |
| Censor                                    | 492/2207 (22.3%)  | 466/2248 (20.7%) | 958/4455 (21.5%)     |
| Event                                     | 122/312 (39.1%)   | 102/267 (38.2%)  | 224/579 (38.7%)      |
| <b>Symptomatic Hypotension</b>            |                   |                  |                      |
| Censor                                    | 522/2290 (22.8%)  | 489/2317 (21.1%) | 1011/4607<br>(21.9%) |
| Event                                     | 92/229 (40.2%)    | 79/198 (39.9%)   | 171/427 (40.0%)      |

Numerators are the number of patients who discontinued treatment. Denominators are the number of patients in each treatment arm, who either experienced the specific safety event or were censored. There were 744 participants with discontinuation due to death, who were excluded from these numbers.



**Table S2. Treatment effect on time to symptomatic hypotension or syncope by NT-proBNP subgroups.**

| Safety outcome                            | Vericiguat    | Placebo       | HR (95% CI)      | P-value |
|-------------------------------------------|---------------|---------------|------------------|---------|
|                                           | Rate (Events) | Rate (Events) |                  |         |
| <b>Symptomatic hypotension or syncope</b> |               |               |                  |         |
| NT-proBNP $\geq$ 4000 pg/mL               | 13.18 (97)    | 12.28 (90)    | 1.08 (0.81–1.43) | 0.386   |
| NT-proBNP <4000 pg/mL                     | 12.03 (202)   | 9.61 (161)    | 1.26 (1.02–1.55) |         |
| NT-proBNP $\geq$ 8000 pg/mL               | 12.92 (33)    | 15.69 (39)    | 0.83 (0.52–1.32) | 0.102   |
| NT-proBNP <8000 pg/mL                     | 12.32 (266)   | 9.82 (212)    | 1.26 (1.05–1.51) |         |
| <b>Symptomatic hypotension</b>            |               |               |                  |         |
| NT-proBNP $\geq$ 4000 pg/mL               | 9.17 (69)     | 9.19 (68)     | 1.00 (0.72–1.40) | 0.241   |
| NT-proBNP <4000 pg/mL                     | 8.66 (149)    | 6.78 (116)    | 1.29 (1.01–1.64) |         |
| NT-proBNP $\geq$ 8000 pg/mL               | 9.66 (25)     | 12.37 (31)    | 0.79 (0.47–1.34) | 0.108   |
| NT-proBNP <8000 pg/mL                     | 8.71 (193)    | 6.95 (153)    | 1.26 (1.02–1.56) |         |
| <b>Syncope</b>                            |               |               |                  |         |
| NT-proBNP $\geq$ 4000 pg/mL               | 4.39 (34)     | 3.64 (28)     | 1.22 (0.74–2.00) | 0.884   |
| NT-proBNP <4000 pg/mL                     | 3.60 (64)     | 3.11 (55)     | 1.16 (0.81–1.66) |         |
| NT-proBNP $\geq$ 8000 pg/mL               | 3.75 (10)     | 4.97 (13)     | 0.76 (0.33–1.73) | 0.263   |
| NT-proBNP <8000 pg/mL                     | 3.85 (88)     | 3.07 (70)     | 1.26 (0.92–1.72) |         |

CI, confidence interval; HR, hazard ratio; NT-proBNP, N-terminal-pro hormone B-type natriuretic peptide.

**Table S3. Treatment effect on time to symptomatic hypotension or syncope by baseline use of SGLT2i.**

|                                           | <b>Vericiguat</b>    | <b>Placebo</b>       |                    |                |
|-------------------------------------------|----------------------|----------------------|--------------------|----------------|
| <b>Symptomatic hypotension or syncope</b> | <b>Rate (Events)</b> | <b>Rate (Events)</b> | <b>HR (95% CI)</b> | <b>P-value</b> |
| No use of SGLT-2 inhibitors               | 12.16 (300)          | 10.34 (257)          | 1.18 (1.00–1.39)   | 0.792          |
| Use of SGLT-2 inhibitors                  | 22.66 (12)           | 17.94 (10)           | 1.32 (0.57–3.06)   |                |

CI, confidence interval; HR, hazard ratio; SGLT-2 , sodium-glucose Cotransporter-2.

**Figure S1. Distribution of baseline SBP in VICTORIA.**

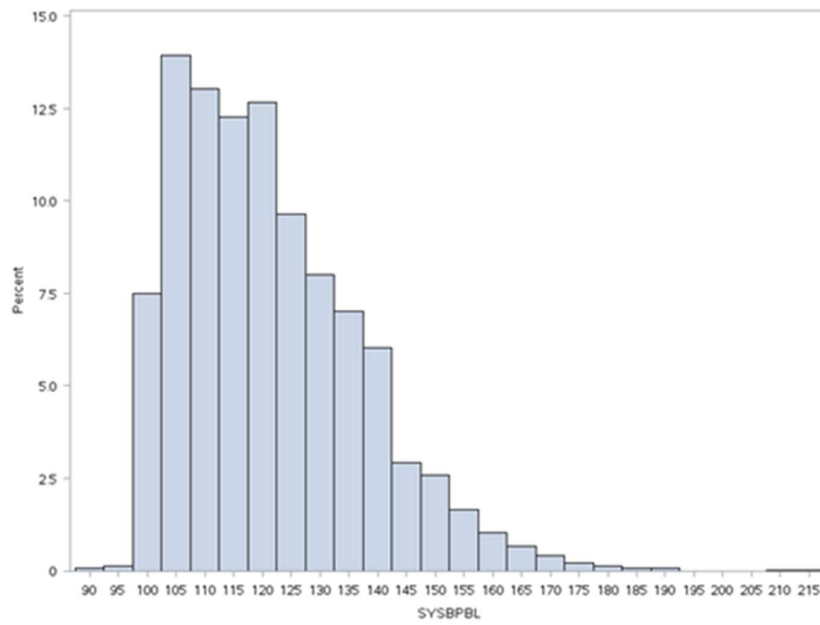

Figure S2. Systolic blood pressure (SBP) trajectory over time by age strata (A) above and below 65 years old, (B) 75 years old, and (C) 85 years old.

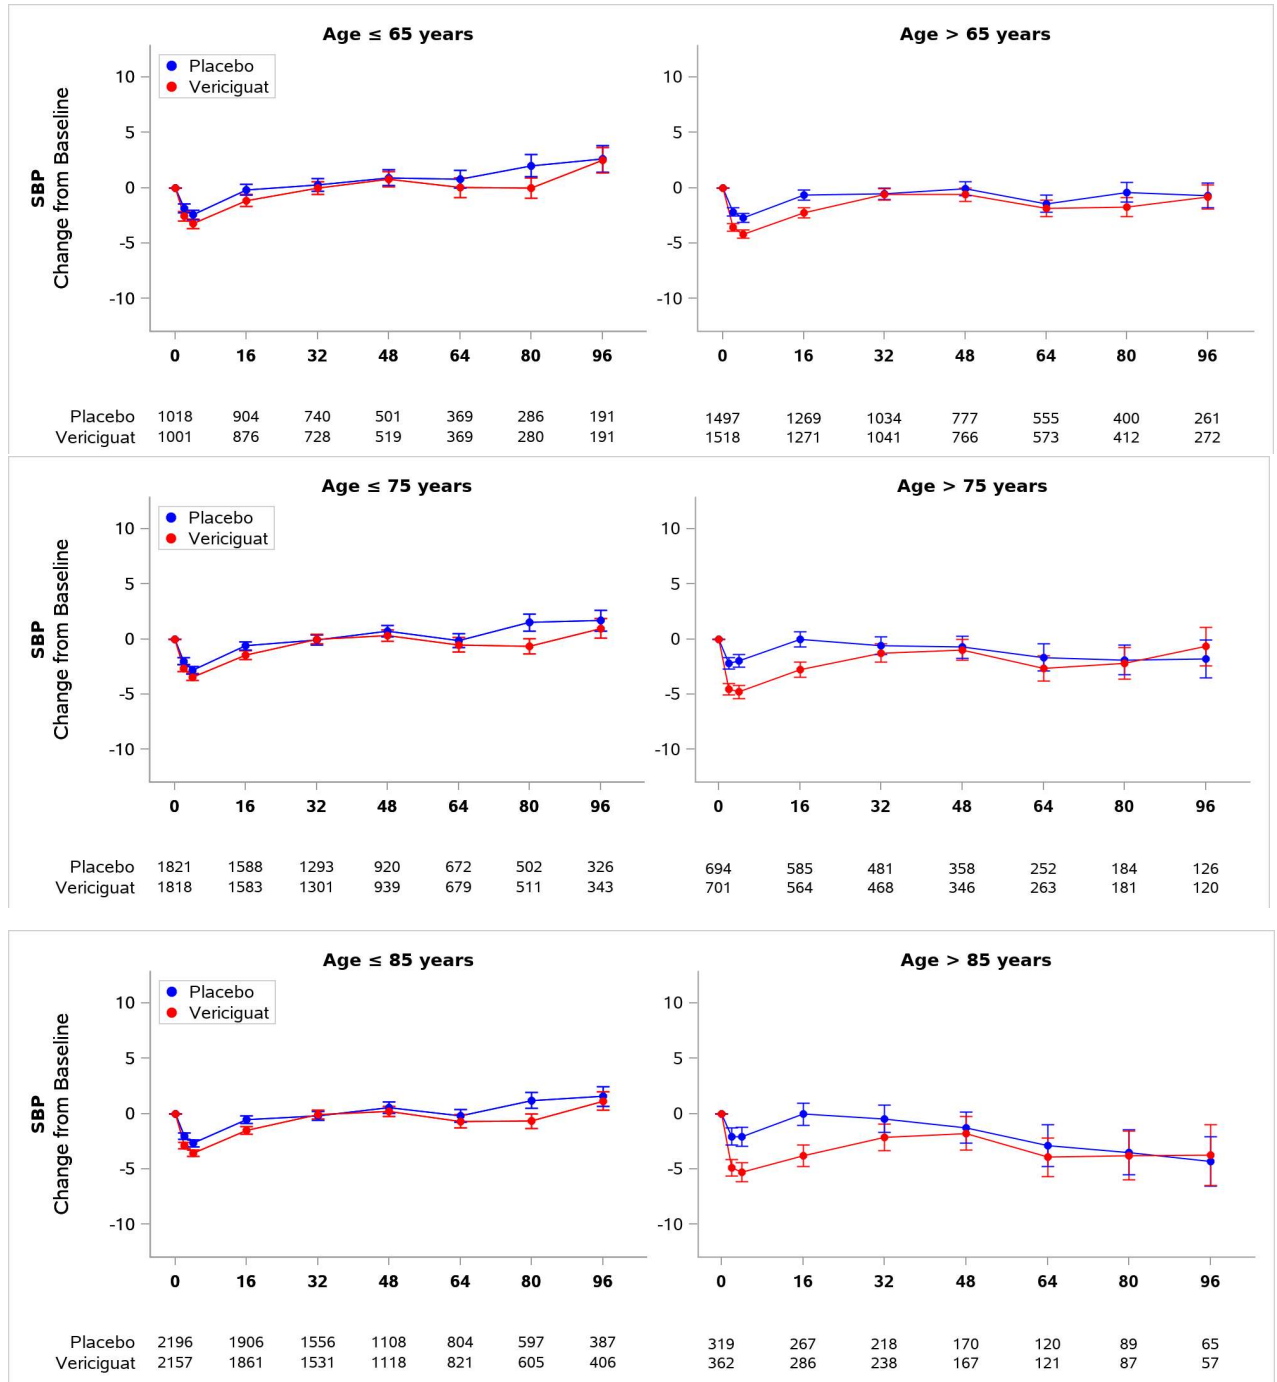

**Figure S3. Systolic blood pressure (SBP) trajectory over time in patients receiving (vs not receiving) (A) any renin angiotension system inhibitor (RAS), (B) maximal dose of RAS, and (C) triple therapy (RAS, beta-blocker and mineralocorticoid receptor antagonist) at baseline**

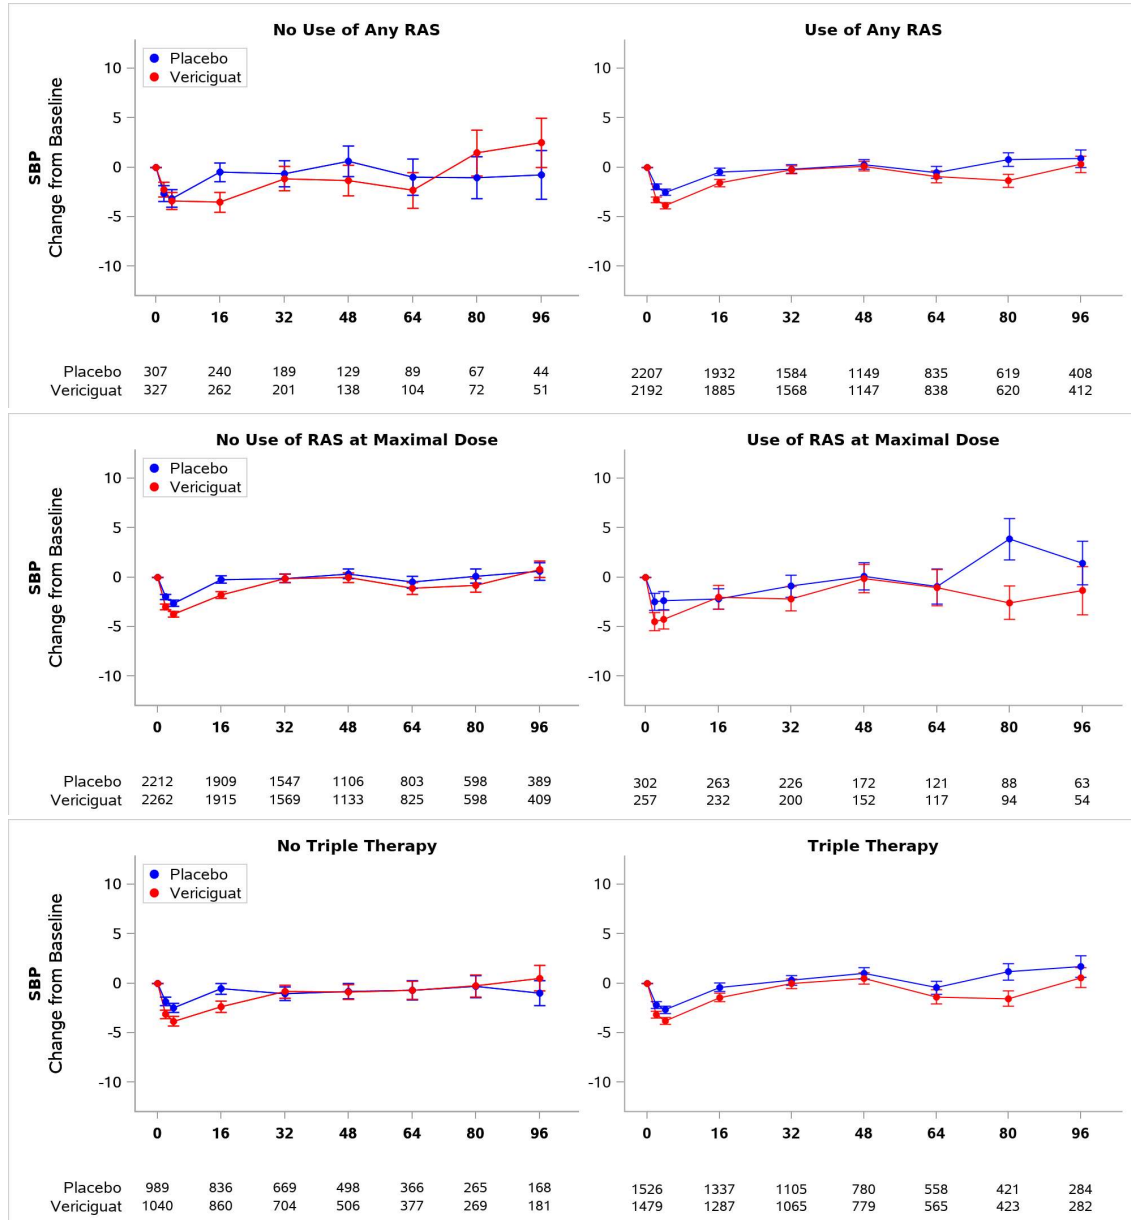

Figure S4. Systolic blood pressure (SBP) trajectory over time in patients with baseline NT-proBNP above and below 4000 pg/mL and 8000 pg/mL

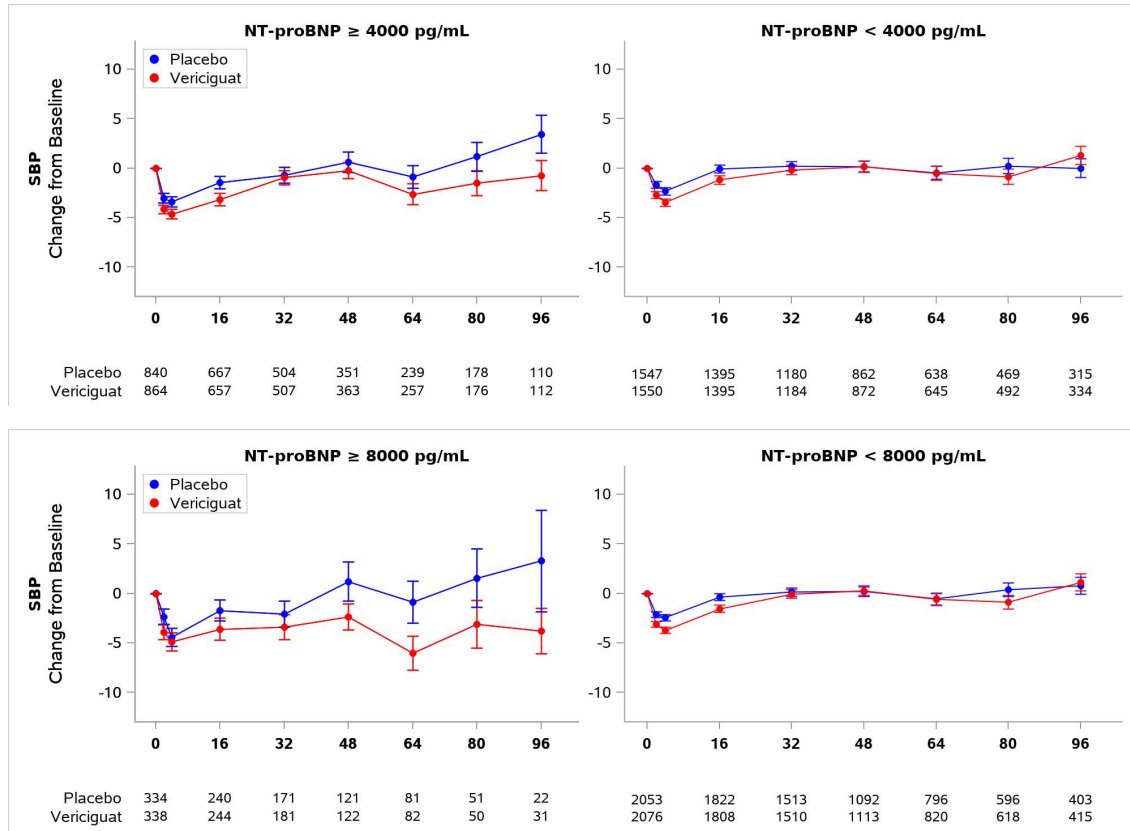

**Figure S5. Systolic blood pressure (SBP) trajectory over time in patients time in patients receiving (vs not receiving) SGLT2i**

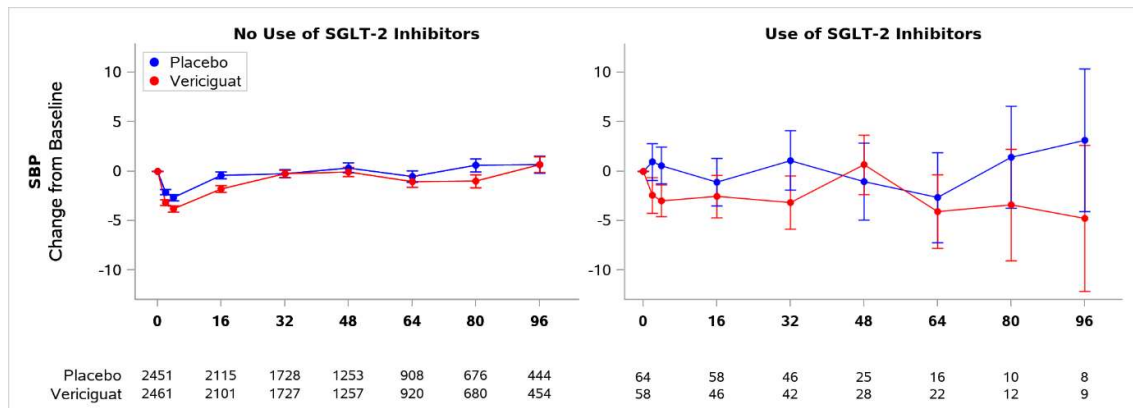

Supplement: JAH3-10-e021094-s001.pdf [file JAH3-10-e021094-s001.pdf]
